# Supplementary material for: Novel quinazolinone inhibitors of the Pseudomonas aeruginosa quorum sensing transcriptional regulator PqsR
Source: PubMed Central journal article supplement — Eur J Med Chem. 2020 Dec 15;208:112778. doi: 10.1016/j.ejmech.2020.112778 (PMC7684530; doi:10.1016/j.ejmech.2020.112778), 2020-12-15
Supplement: mmc1.pdf [file mmc1.pdf]

## Supplementary Information:

S1: Representative NMR spectra of compounds **18** (a, <sup>1</sup>H; b, <sup>13</sup>C) and **25** (c, <sup>1</sup>H; d, <sup>13</sup>C)

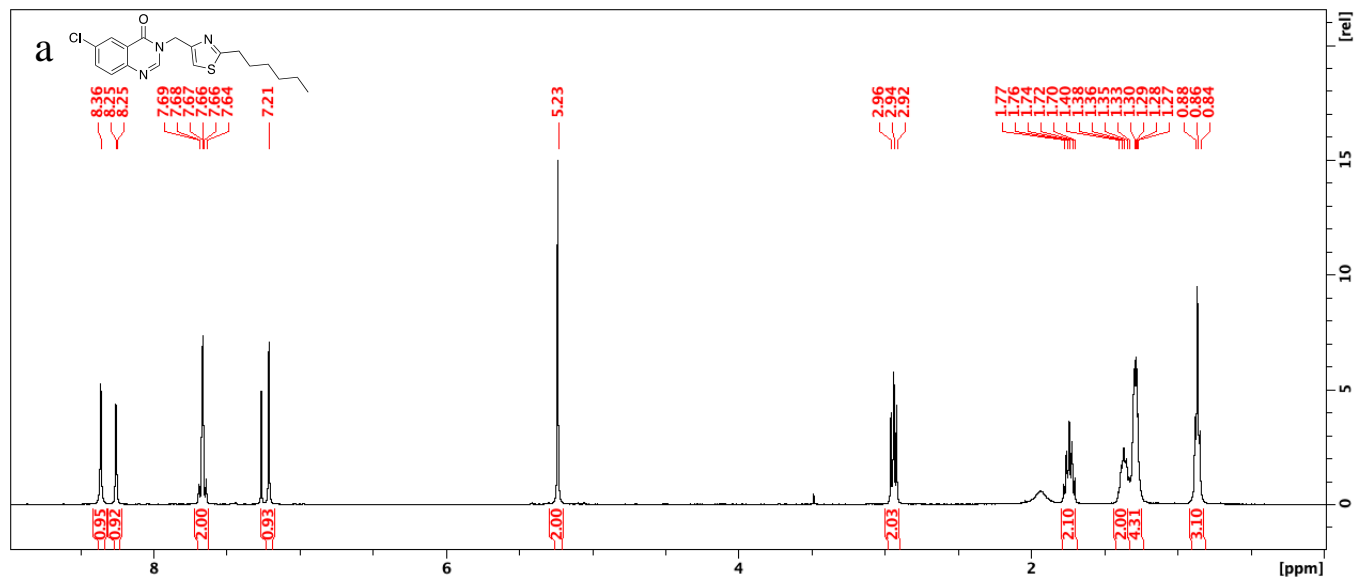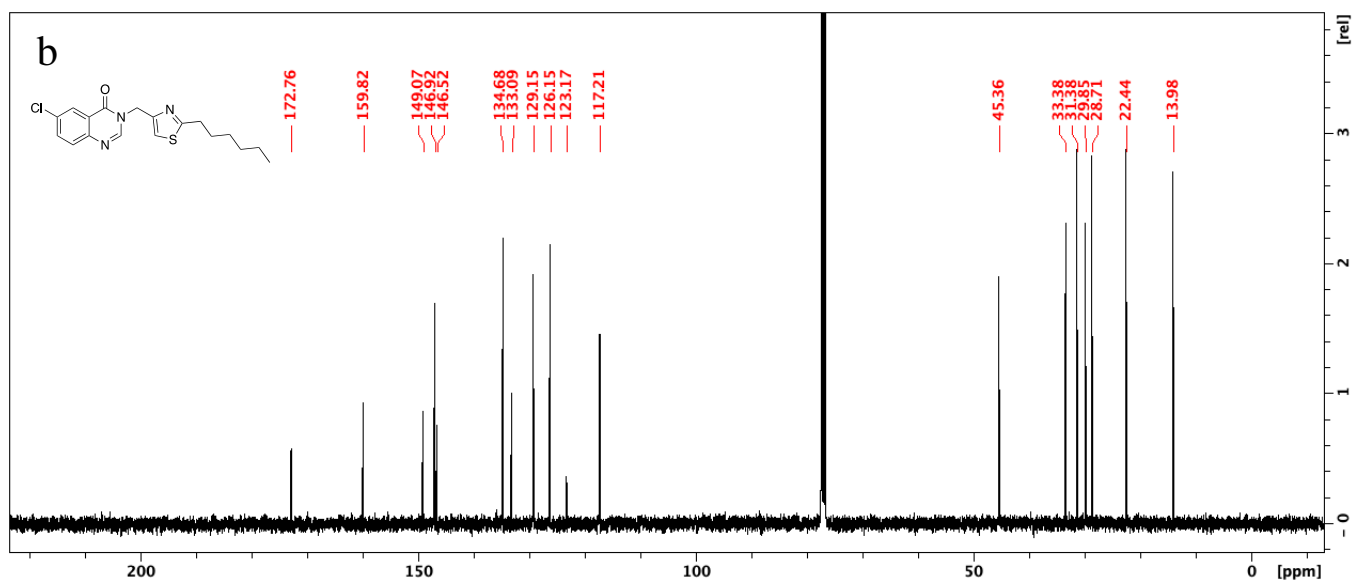

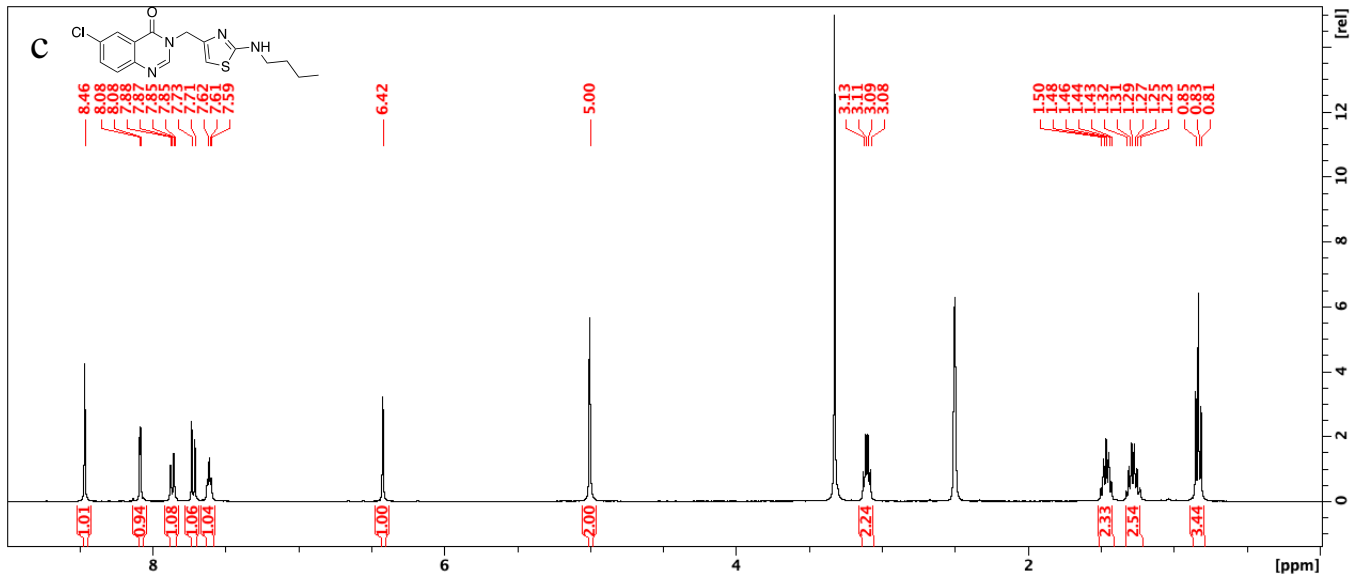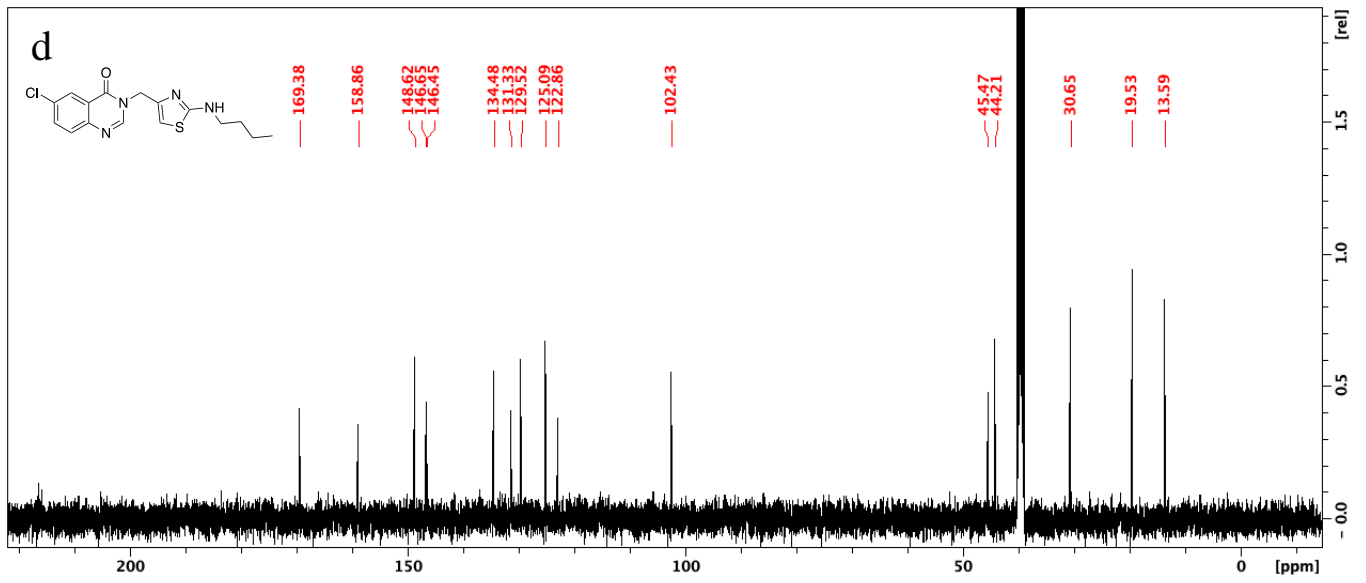

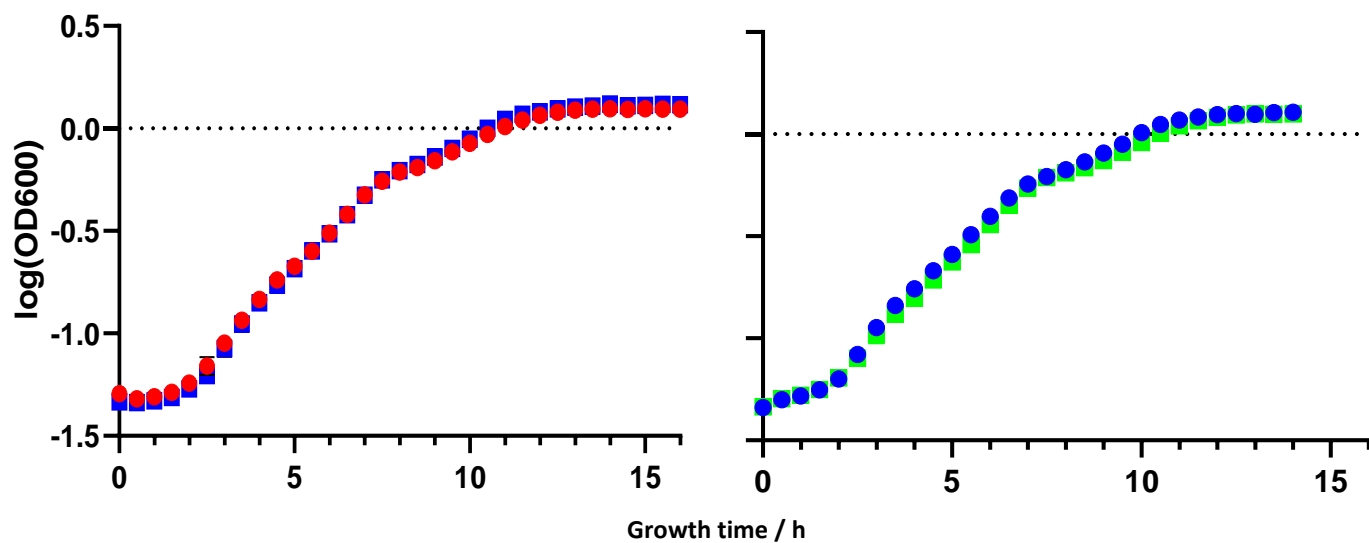

S2: Growth curves of *Pseudomonas aeruginosa* strain PA01-L containing (left, red) **18** or (right, green) **19** compared to a control of 0.1% DMSO (left and right, blue). No difference in growth over a 15 h incubation was observed, confirming a lack of bactericidal activity

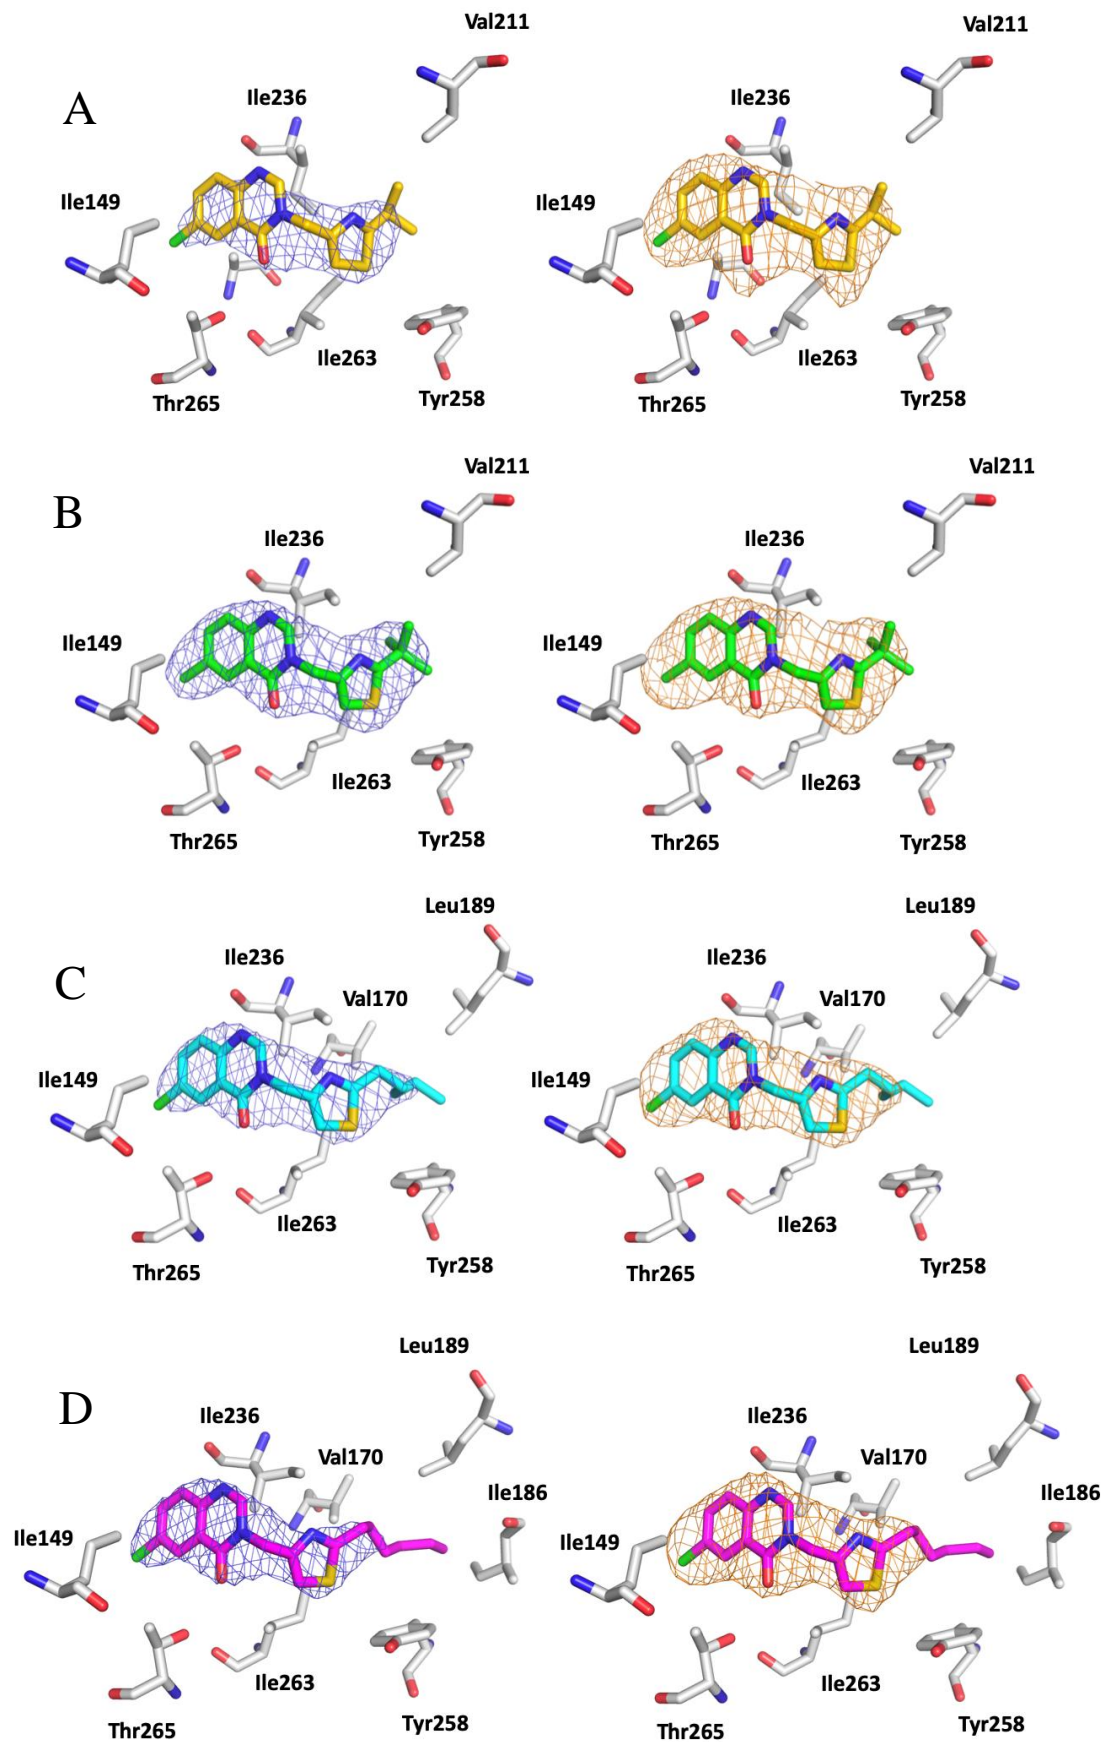

S3: Electron density maps for **6**, **12**, **18** and **19** (A – gold, B – green, C – cyan, and D – magenta, respectively) in complex with PqsR<sup>LBd</sup>: left 2mFoDFc map ( $\sigma = 1$ ) generated by REFMAC, and right OMIT map mFo-DFc ( $\sigma = 3$ ) generated by PHENIX.polder

Val211

Leu189

Ile186

Tyr258

Val170

S4: Predicted hydrophobic interactions between LBD and (top left) **6**, (top right) **12**, (bottom left) **18** and (bottom right) **19**, as calculated by Schrodinger's Maestro software. The longer alkyl chains of **18** and **19** are capable of forming a dense network of interactions, in particular with Ile186 and Leu189, compared with **6** and **12** which formed fewer interactions with Leu189 and none with Ile186

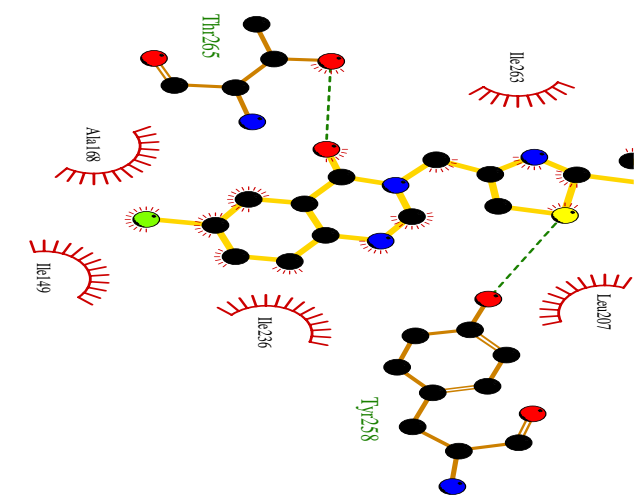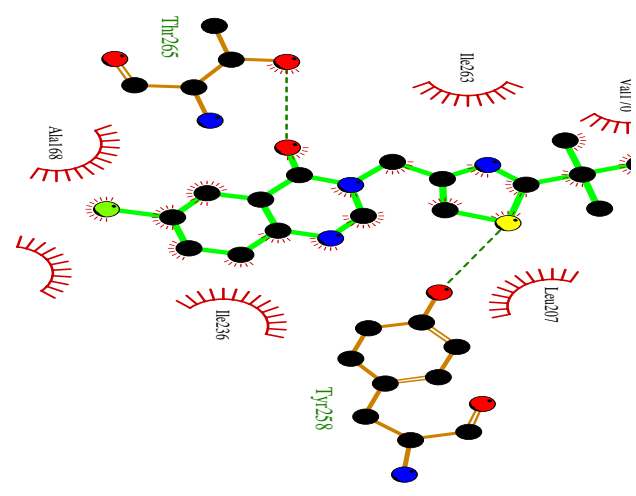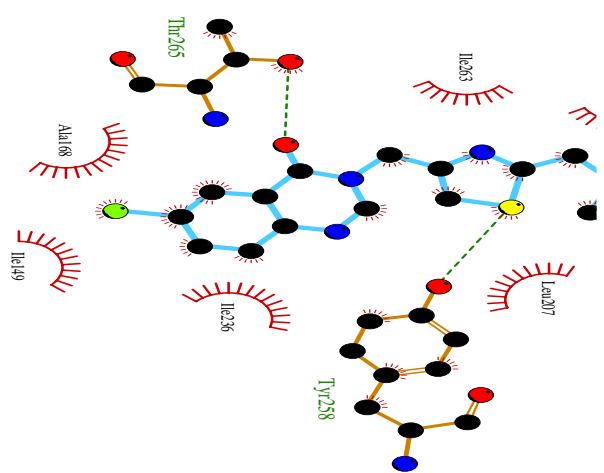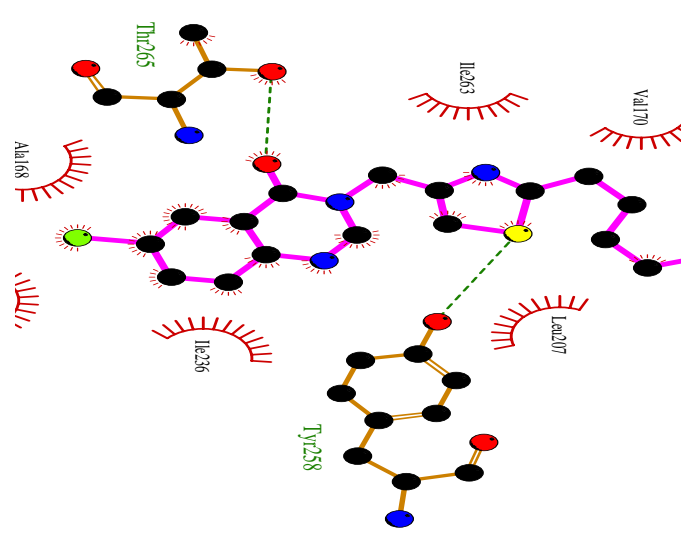

S5: LigPlot schematics depicting the polar (green dashed lines) and hydrophobic (red dashed semicircles) between all four crystallised ligands and the PqsR LBD

S6: Crystallographic table of data collection and refinement:

| Data collection                  | <b>6</b>                 | <b>12</b>                 | <b>18</b>                 | <b>19</b>                 |
|----------------------------------|--------------------------|---------------------------|---------------------------|---------------------------|
| Beamline                         | I04                      | I04                       | I04                       | I04                       |
| Wavelength (Å)                   | 0.9795                   | 0.9795                    | 0.9795                    | 0.9795                    |
| Space group                      | P6 <sub>5</sub> 22       | P6 <sub>5</sub> 22        | P6 <sub>5</sub> 22        | P6 <sub>5</sub> 22        |
| a, b, c (Å)                      | 120.27, 120.27<br>115.04 | 120.79, 120.79,<br>114.39 | 118.91, 118.91,<br>115.46 | 119.32, 119.32,<br>114.76 |
| $\alpha, \beta, \gamma$ (°)      | 90. 90. 120              | 90, 90, 120               | 90, 90, 120               | 90, 90, 120               |
| Resolution                       | 60.13 – 3.15             | 60.39 - 2.95              | 115.46 – 3.2              | 59.66 – 3.00              |
| No. of unique reflections        | 8476 (1514)              | 10879 (1704)              | 7628 (1370)               | 10169 (1599)              |
| R <sub>merge</sub> (%)           | 8.1 (80.3)               | 8.5 (107)                 | 6.1 (39.8)                | 9.7 (170)                 |
| Mean I/Sig(I)                    | 13.9 (2.9)               | 12.6 (1.7)                | 16.6 (3.1)                | 17.1 (1.7)                |
| Completeness                     | 95.7 (96.6)              | 100 (100)                 | 92.4 (93.7)               | 100 (100)                 |
| Redundancy                       | 10.1 (10.4)              | 9.6 (10.2)                | 9 (9)                     | 19.2 (20.2)               |
| CC <sub>1/2</sub>                | 0.970 (0.966)            | 0.998 (0.917)             | 0.997 (0.972)             | 0.999 (0.932)             |
| Refinement                       |                          |                           |                           |                           |
| Resolution range (Å)             | 60.20-3.15               | 60.47 - 2.95              | 76.97 – 3.2               | 59.73 – 3.00              |
| R/Rfree                          | 0.195 / 0.241            | 0.20/0.257                | 0.204/0.261               | 0.193/0.255               |
| Mean B-Factor (Å <sup>2</sup> )  | 143.6                    | 131.6                     | 146.2                     | 139                       |
| r.m.s.d bond lengths (Å)         | 0.0077                   | 0.0081                    | 0.0025                    | 0.0076                    |
| r.m.s.d bond angles (°)          | 1.653                    | 1.671                     | 1.236                     | 1.364                     |
| Ramachandran plot statistics (%) |                          |                           |                           |                           |
| Preferred regions                | 97.51                    | 95.52                     | 96.52                     | 94.53                     |
| Outliers                         | 0                        | 0                         | 0                         | 0                         |
| PDB ID                           | 6Z17                     | 6Z07                      | 6Z5K                      | 6YZ3                      |

Values in parentheses are for highest-resolution shell.
